# Supplementary material for: Near-infrared fluorescent probes for the detection of glutathione and their application in the fluorescence imaging of living cells and tumor-bearing mice
Source: Royal Society of Chemistry journal article supplement (doi:10.1039/c7tb01560g), 2017-07-03
Supplement: c7tb01560g1.pdf [file c7tb01560g1.pdf]

## Supporting Information for

### Near-infrared fluorescent probes for the detection of glutathione and their application in the fluorescent imaging of living cells and tumor-bearing mice

Dayoung Lee,<sup>a†</sup> Keunsoo Jeong,<sup>b†</sup> Xiao Luo,<sup>c</sup> Gayoung Kim,<sup>b</sup> Youjun Yang,<sup>c</sup> Xiaoqiang Chen,<sup>\*a,d</sup>  
Sehoon Kim,<sup>\*b</sup> and Juyoung Yoon<sup>\*a</sup>

<sup>a</sup> *Department of Chemistry and Nano Science (BK21), Ewha Womans University, Seoul 120-750, Korea.*

<sup>b</sup> *Center for Theragnosis, Korea Institute of Science and Technology, Hwarangno 14-gil 5, Seongbuk-gu, Seoul 136-791, Korea.*

<sup>c</sup> *State Key Laboratory of Bioreactor Engineering, East China University of Science and Technology, Meilong Rd. 130, Shanghai 200236, China.*

<sup>d</sup> *State Key laboratory of Materials-Oriented Chemical Engineering, College of Chemical Engineering, Jiangsu National Synergetic Innovation Center for Advanced Materials (SICAM), Nanjing Tech University, Nanjing 210009, China.*

*jyoon@ewha.ac.kr; sehoonkim@kist.re.kr; chenxq@njtech.edu.cn*

*†equally contributed to this work*

## Contents

|                                                                                                                                                                                                                                                                                                                                                                                                                                                                                                                                 |     |
|---------------------------------------------------------------------------------------------------------------------------------------------------------------------------------------------------------------------------------------------------------------------------------------------------------------------------------------------------------------------------------------------------------------------------------------------------------------------------------------------------------------------------------|-----|
| <b>Figure S1.</b> $^1\text{H}$ NMR (300 MHz) of compound <b>1</b> in $\text{CDCl}_3$ .....                                                                                                                                                                                                                                                                                                                                                                                                                                      | S3  |
| <b>Figure S2.</b> $^{13}\text{C}$ NMR (75 MHz) of compound <b>1</b> in $\text{CDCl}_3$ .....                                                                                                                                                                                                                                                                                                                                                                                                                                    | S3  |
| <b>Figure S3.</b> ESI mass spectrum of compound <b>1</b> .....                                                                                                                                                                                                                                                                                                                                                                                                                                                                  | S4  |
| <b>Figure S4.</b> $^1\text{H}$ NMR (300 MHz) of compound <b>2</b> in $\text{CDCl}_3$ .....                                                                                                                                                                                                                                                                                                                                                                                                                                      | S4  |
| <b>Figure S5.</b> $^{13}\text{C}$ NMR (75 MHz) of compound <b>2</b> in $\text{CDCl}_3$ .....                                                                                                                                                                                                                                                                                                                                                                                                                                    | S5  |
| <b>Figure S6.</b> FAB mass spectrum of compound <b>2</b> .....                                                                                                                                                                                                                                                                                                                                                                                                                                                                  | S5  |
| <b>Figure S7.</b> Fluorescence titrations of probe <b>1</b> (10 $\mu\text{M}$ ) with GSH (0-50 eq.) in HEPES (0.01 M, pH 7.4) containing 1% DMSO.....                                                                                                                                                                                                                                                                                                                                                                           | S6  |
| <b>Figure S8.</b> Fluorescence titrations of probe <b>2</b> (10 $\mu\text{M}$ ) with GSH (0-50 eq.) in HEPES (0.01 M, pH 7.4) containing 1% DMSO.....                                                                                                                                                                                                                                                                                                                                                                           | S6  |
| <b>Figure S9.</b> Normalized fluorescence responses of probe <b>1</b> (1 $\mu\text{M}$ ) to changing GSH concentrations in DMSO-HEPES (0.01M, pH 7.4) (1:99, v/v).....                                                                                                                                                                                                                                                                                                                                                          | S7  |
| <b>Figure S10.</b> Normalized fluorescence responses of probe <b>2</b> (1 $\mu\text{M}$ ) to changing GSH concentrations in DMSO-HEPES (0.01M, pH 7.4) (1:99, v/v).....                                                                                                                                                                                                                                                                                                                                                         | S7  |
| <b>Figure S11.</b> LC/MS characterization of probe <b>1</b> +GSH.....                                                                                                                                                                                                                                                                                                                                                                                                                                                           | S8  |
| <b>Figure S12.</b> LC/MS characterization of probe <b>2</b> +GSH.....                                                                                                                                                                                                                                                                                                                                                                                                                                                           | S8  |
| <b>Figure S13.</b> Fluorescent changes of probe <b>1</b> (10 $\mu\text{M}$ ) upon the addition of Cys, Hcy, and GSH (10 equiv.) in HEPES (0.01 M, pH 7.4) containing 1% DMSO.....                                                                                                                                                                                                                                                                                                                                               | S9  |
| <b>Figure S14.</b> Fluorescent changes of probe <b>2</b> (10 $\mu\text{M}$ ) upon the addition of Cys, Hcy, and GSH (10 equiv.) in HEPES (0.01 M, pH 7.4) containing 1% DMSO.....                                                                                                                                                                                                                                                                                                                                               | S9  |
| <b>Figure S15.</b> Time-dependent change of probe <b>1</b> (10 $\mu\text{M}$ ) with the addition of 10 equiv. of GSH or Hcy in DMSO-HEPES (0.01M, pH 7.4) (1:99, v/v).....                                                                                                                                                                                                                                                                                                                                                      | S10 |
| <b>Figure S16.</b> Time-dependent change of probe <b>2</b> (10 $\mu\text{M}$ ) with the addition of 10 equiv. of GSH or Hcy in DMSO-HEPES (0.01M, pH 7.4) (1:99, v/v).....                                                                                                                                                                                                                                                                                                                                                      | S10 |
| <b>Figure S17.</b> <i>In vivo</i> fluorescence responses of probe <b>2</b> in SCC7 tumor-bearing mice (n=4). a) Temporal fluorescence images of mice before and after the probe injection ( $\lambda_{\text{ex}} = 745 \text{ nm}$ , $\lambda_{\text{em}} = 820 \text{ nm}$ ), where probe <b>2</b> (40 $\mu\text{L}$ , 10 $\mu\text{M}$ in PBS, pH 7.4) was injected peritumorally (tumor side, red arrow) or subcutaneously (normal side, green arrow). b) Temporal intensity changes of fluorescence from tumor (circle) and |     |

normal (square) tissues obtained from the *in vivo* imaging  
(a).....S11

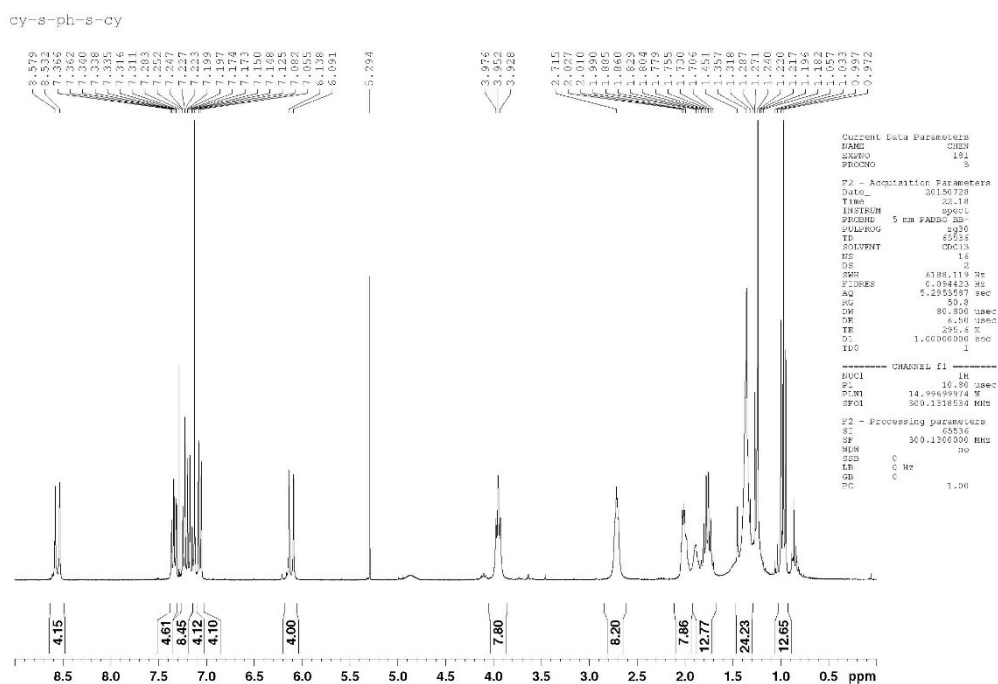

Figure S1. <sup>1</sup>H NMR (300 MHz) of compound 1 in CDCl<sub>3</sub>

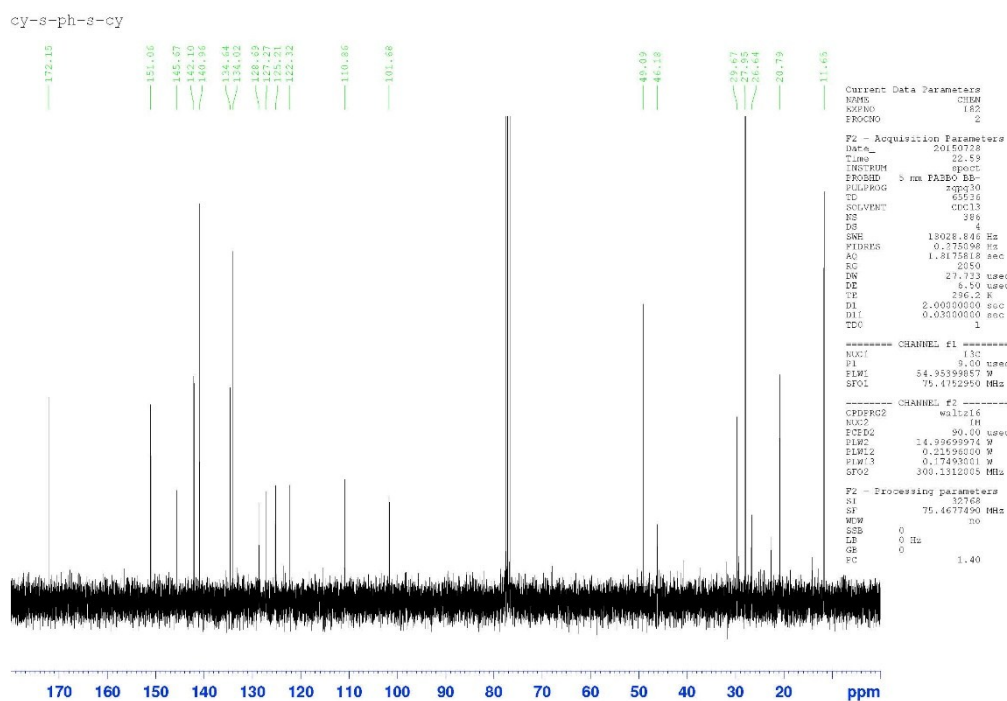

Figure S2. <sup>13</sup>C NMR (75 MHz) of compound 1 in CDCl<sub>3</sub>.

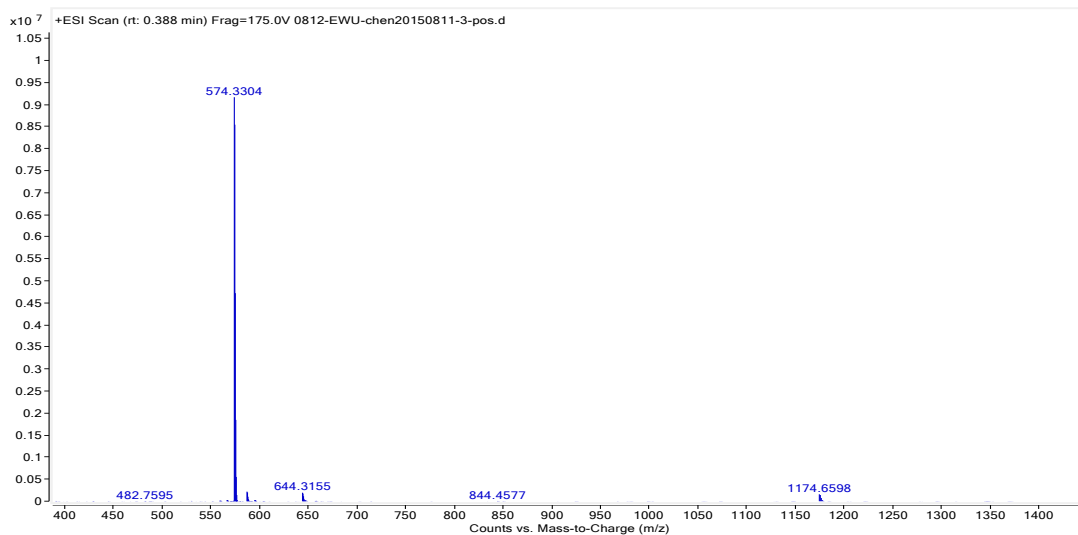

Figure S3. ESI mass spectrum of compound 1.

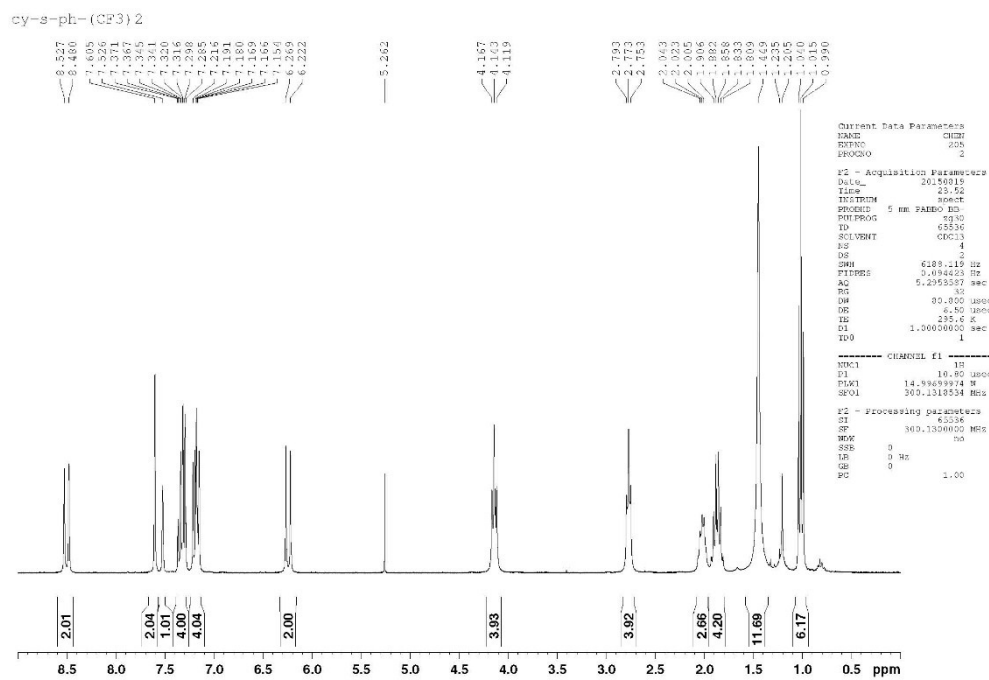

Figure S4. <sup>1</sup>H NMR (300 MHz) of compound 2 in CDCl<sub>3</sub>

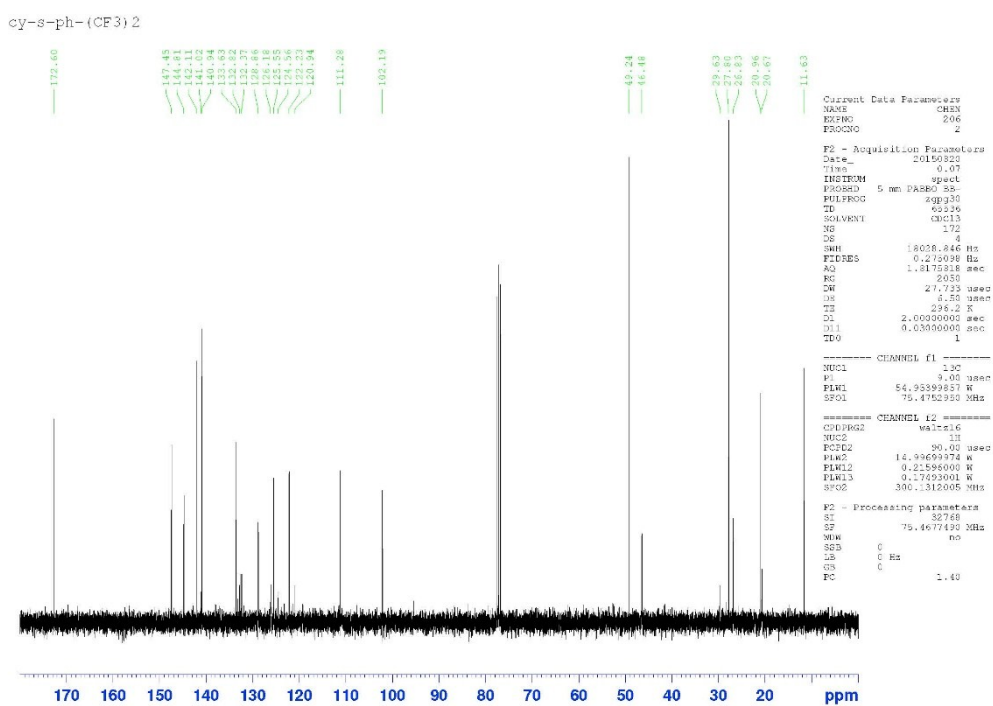

Figure S5. <sup>13</sup>C NMR (75 MHz) of compound **2** in CDCl<sub>3</sub>.

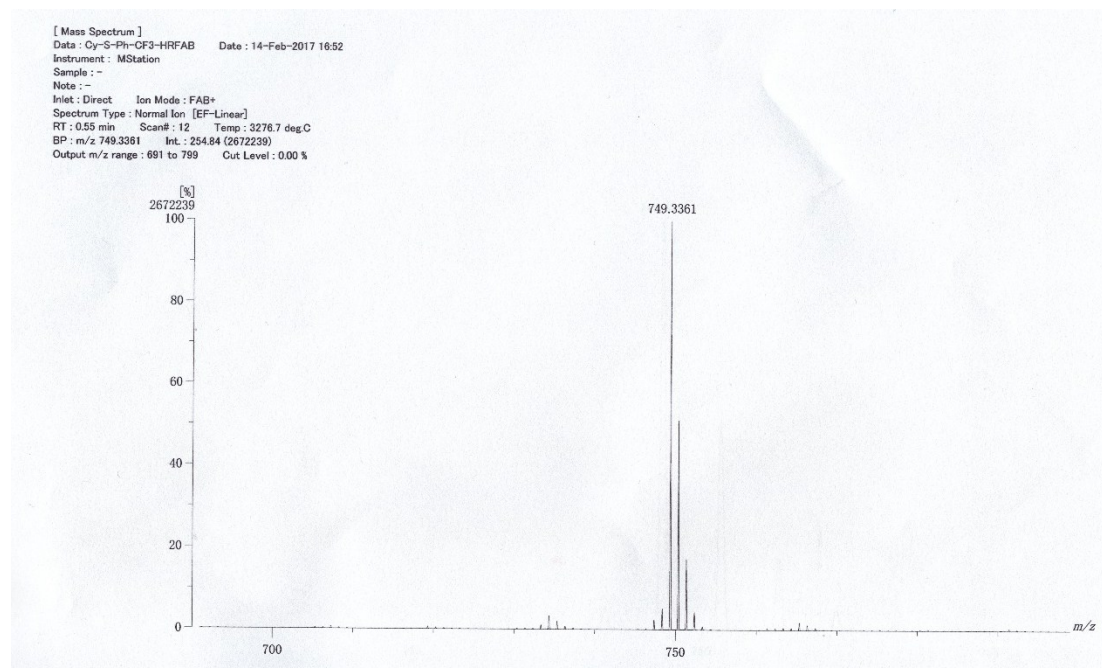

Figure S6. FAB mass spectrum of compound **2**.

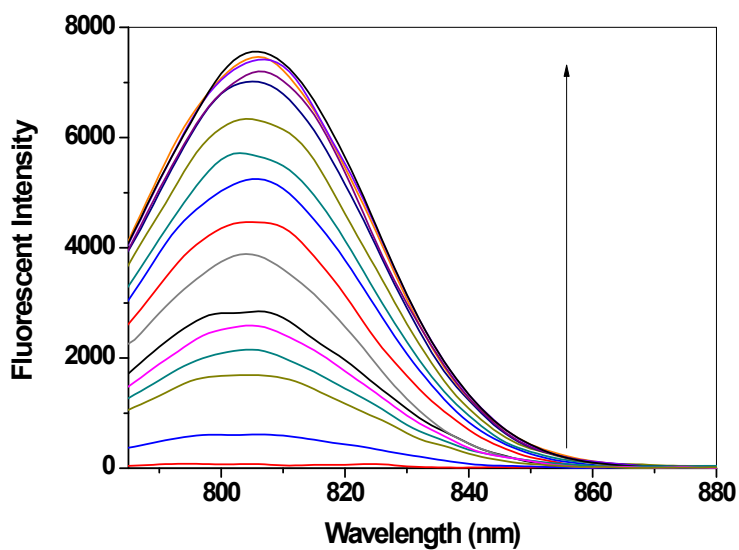

**Figure S7.** Fluorescence titrations of probe 1 (10  $\mu$ M) with GSH (0-50 eq.) in HEPES (0.01 M, pH 7.4) containing 1% DMSO (excitation wavelength : 780 nm). Spectrum was obtained 60 min after mixing.

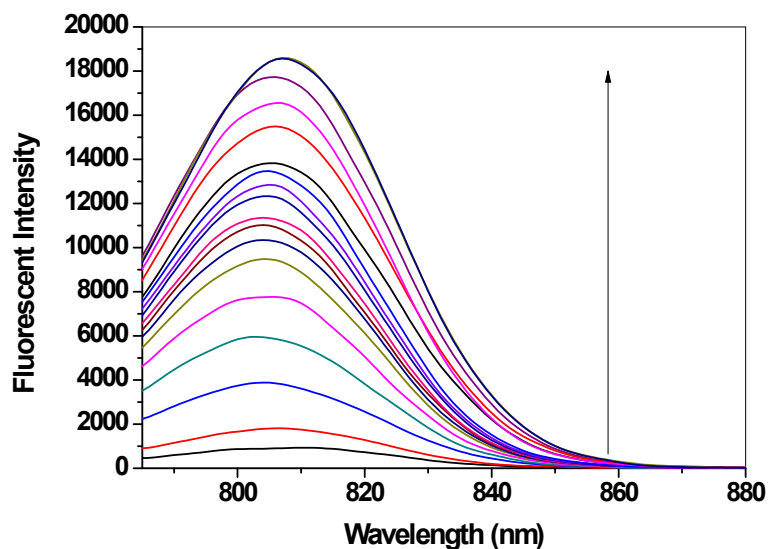

**Figure S8.** Fluorescence titrations of probe 2 (10  $\mu$ M) with GSH (0-50 eq.) in HEPES (0.01 M, pH 7.4) containing 1% DMSO (excitation wavelength : 780 nm). Spectrum was obtained 60 min after mixing.

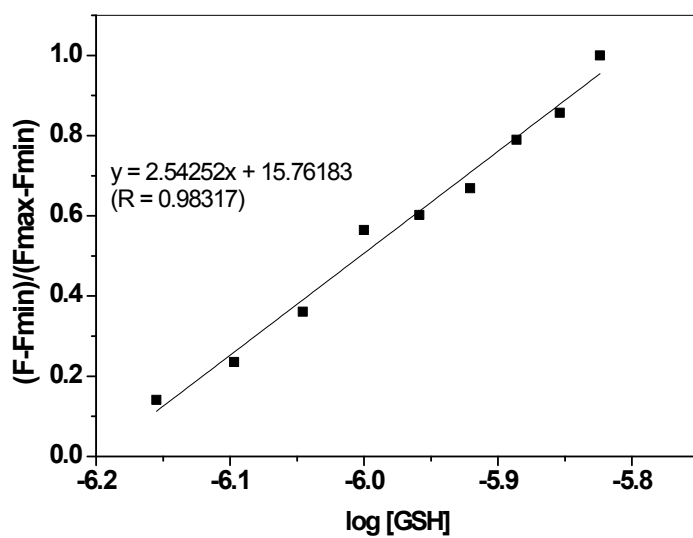

**Figure S9.** Normalized fluorescence responses of probe **1** (1 μM) to changing GSH concentrations in DMSO-HEPES (0.01M, pH 7.4) (1:99, v/v). (Detection limit =  $6.32 \times 10^{-7} M$ )

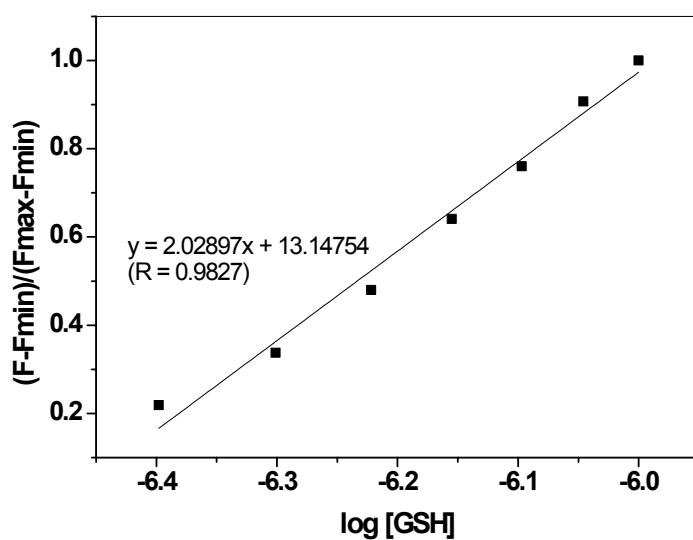

**Figure S10.** Normalized fluorescence responses of probe **2** (1 μM) to changing GSH concentrations in DMSO-HEPES (0.01M, pH 7.4) (1:99, v/v). (Detection limit =  $3.31 \times 10^{-7} M$ )



+ESI Scan (rt: 0.153 min) Frag=380.0V 170520-EWU-Cy-GS1

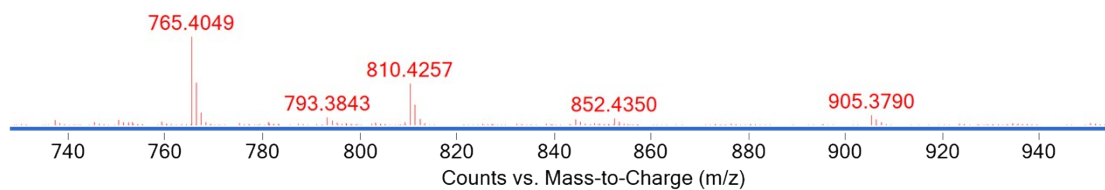

**Figure S11.** LC/MS characterization of probe **1**+GSH.

+ESI Scan (rt: 0.190 min) Frag=380.0V 170530-EWU-Cy-GS2

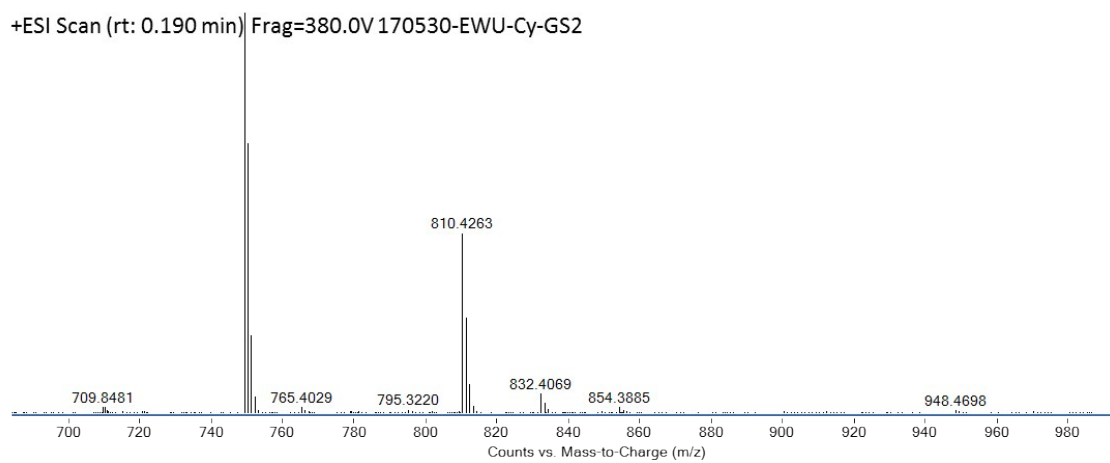

**Figure S12.** LC/MS characterization of probe **2**+GSH.

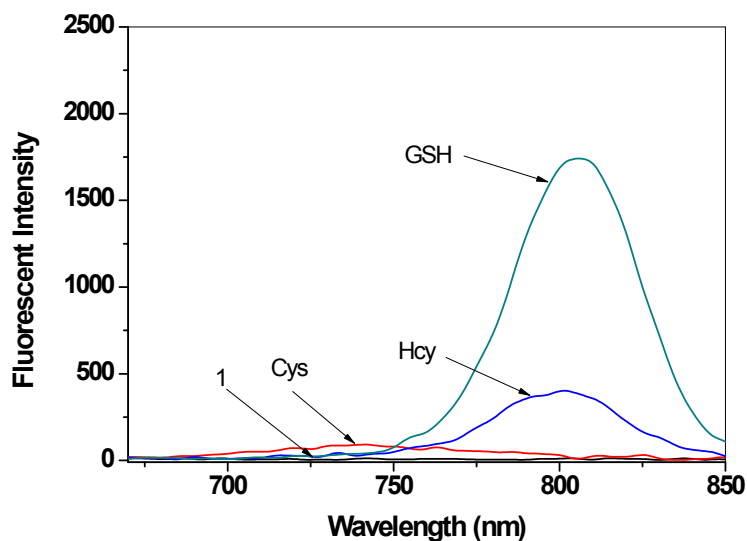

**Figure S13.** Fluorescent changes of probe **1** (10 μM) upon the addition of Cys, Hcy, and GSH (10 equiv.) in HEPES (0.01 M, pH 7.4) containing 1% DMSO (Excitation wavelength: 650 nm). Each spectrum was obtained 30 min after mixing.

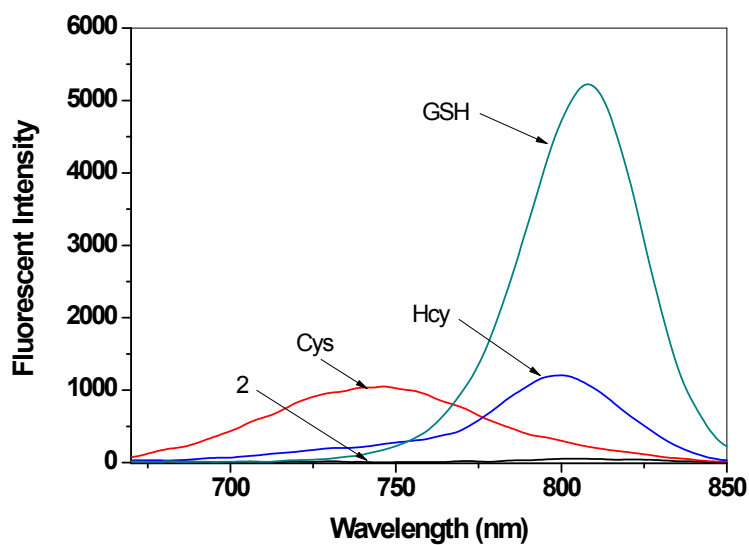

**Figure S14.** Fluorescent changes of probe **2** (10 μM) upon the addition of Cys, Hcy, and GSH (10 equiv.) in HEPES (0.01 M, pH 7.4) containing 1% DMSO (Excitation wavelength: 650 nm). Each spectrum was obtained 30 min after mixing.

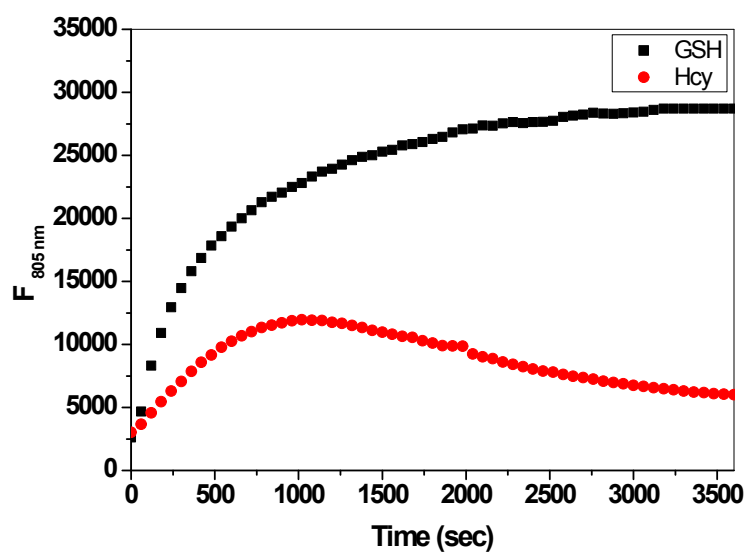

**Figure S15.** Time-dependent change of probe 1 (10  $\mu$ M) with the addition of 10 equiv. of GSH or Hcy in DMSO-HEPES (0.01M, pH 7.4) (1:99, v/v) (Excitation wavelength: 780 nm).

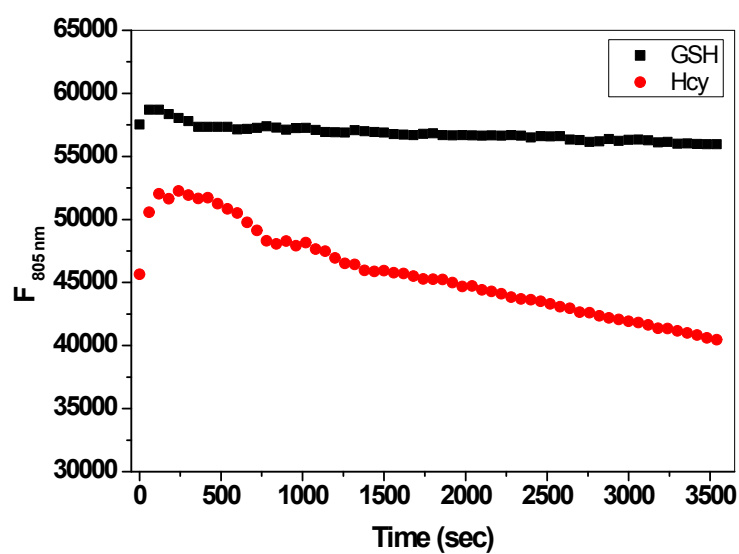

**Figure S16.** Time-dependent change of probe 2 (10  $\mu$ M) with the addition of 10 equiv. of GSH or Hcy in DMSO-HEPES (0.01M, pH 7.4) (1:99, v/v) (Excitation wavelength: 780 nm).

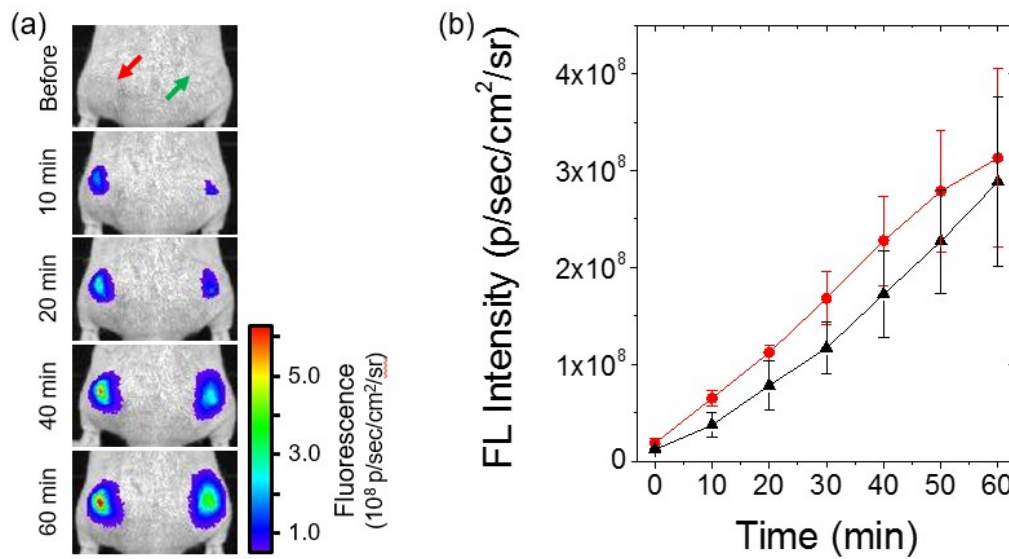

**Figure S17.** *In vivo* fluorescence responses of probe **2** in SCC7 tumor-bearing mice (n=4). a) Temporal fluorescence images of mice before and after the probe injection ( $\lambda_{\text{ex}} = 745 \text{ nm}$ ,  $\lambda_{\text{em}} = 820 \text{ nm}$ ), where probe **2** ( $40 \mu\text{L}$ ,  $10 \mu\text{M}$  in PBS, pH 7.4) was injected peritumorally (tumor side, red arrow) or subcutaneously (normal side, green arrow). b) Temporal intensity changes of fluorescence from tumor (circle) and normal (triangle) tissues obtained from the *in vivo* imaging (a).
